# Supplementary material for: Use of UMFNPs/Ce6@MBs in multimodal imaging-guided sono-photodynamic combination therapy for hepatocellular carcinoma
Source: Royal Society of Chemistry journal article supplement (doi:10.1039/d4bm00613e), 2024-10-24
Supplement: d4bm00613e8.pdf [file d4bm00613e8.pdf]

## Supplementary Information

### Use of UMFNPs/Ce6@MBs in multimodal imaging-guided sono-photodynamic combination therapy for hepatocellular carcinoma

Lijun Xing<sup>a,b,†</sup>, Xiaoting Yang<sup>a,†</sup>, Jianhua Bai<sup>a,†</sup>, Chunting Zhong<sup>a,†</sup>, Jing Cai<sup>c,†</sup>, Qing Dan<sup>a</sup>, Yiran Ji<sup>a</sup>, Bingxuan Xu<sup>a</sup>, Keyan Yu<sup>d</sup>, Xiaoyu Chen<sup>a</sup>, Yulong Qi<sup>d</sup>, Li Li<sup>e</sup>, Yun Chen<sup>a,\*</sup>, Xintao Shuai<sup>f,\*</sup>, Guanxun Cheng<sup>d,\*</sup>, Liu Li<sup>a,\*</sup>, Tingting Zheng<sup>a,\*</sup>

<sup>a</sup> Shenzhen Key Laboratory for Drug Addiction and Medication Safety, Department of Ultrasound, Institute of Ultrasonic Medicine, Peking University Shenzhen Hospital, Shenzhen Peking University-The Hong Kong University of Science and Technology Medical Center, Shenzhen 518036, Guangdong, P. R. China.

<sup>b</sup> Department of Hubei University of Medicine, Wuhan 430000, Hubei, P. R. China.

<sup>c</sup> Guangdong Provincial Key Laboratory of Malignant Tumor Epigenetics and Gene Regulation, Guangdong-Hong Kong Joint Laboratory for RNA Medicine, Medical Research Center, Sun Yat-sen Memorial Hospital, Sun Yat-sen University, Guangzhou, 510000, Guangdong, P.R. China.

<sup>d</sup> Department of Medical Imaging, Peking University Shenzhen Hospital, Shenzhen 518036, Guangdong, P. R. China.

<sup>e</sup> Department of Medical Imaging, State Key Laboratory of Oncology in South China, Collaborative Innovation Center for Cancer Medicine, Sun Yat-sen University Cancer Center, Sun Yat-sen University, Guangzhou 510000, China.

<sup>f</sup> PCFM Lab of Ministry of Education, School of Materials Science and Engineering, Sun Yat-Sen University, Guangzhou 510275, Guangdong, P. R. China.

\*Corresponding authors: kyzs\_018@126.com; liuli@pkusz.com; chengguanxun@hotmail.com; shuaixt@mail.sysu.edu.cn; yunchen@sphmc.org.

† These authors contribute equally.

Electronic Supplementary Information (ESI) available:XXXXX;

|         | <i>Table of Images</i>            | <i>Page</i> |
|---------|-----------------------------------|-------------|
| Part 1. | Ultraviolet spectrogram           | 3           |
| Part 2. | Fluorescence quantization in vivo | 3           |
| Part 3. | Anatomy of subcutaneous tumor     | 4           |
| Part 4. | Focused ultrasonic probe          | 4           |
| Part 5. | Ultrasonic blasting instrument    | 5           |
| Part 6. | Confocal microscopy images        | 5           |

## Part 1. Ultraviolet spectrogram

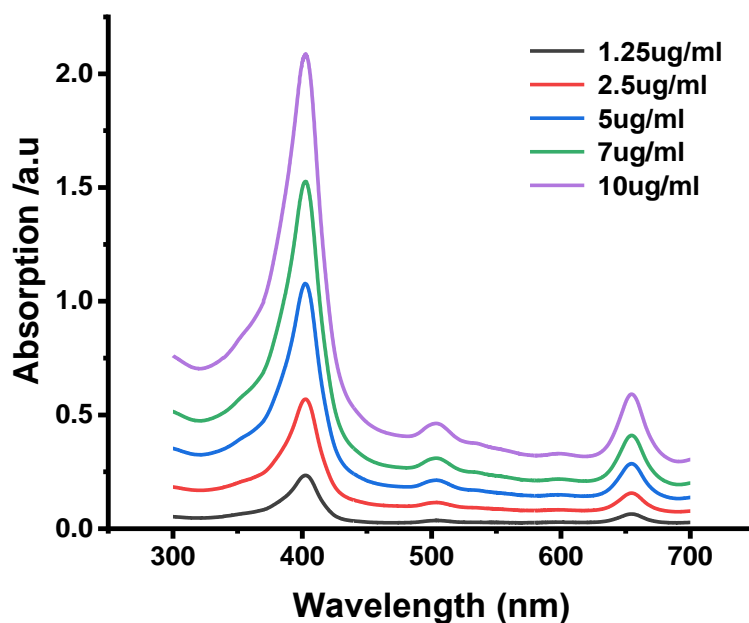

Fig. S1 Absorbance of different concentrations of UMFNPs/Ce6@MBs G (1.25, 2.5, 5, 7, and 10  $\mu\text{g/mL}$ ) measured using an ultraviolet spectrophotometer.

## Part 2. Fluorescence quantization in vivo

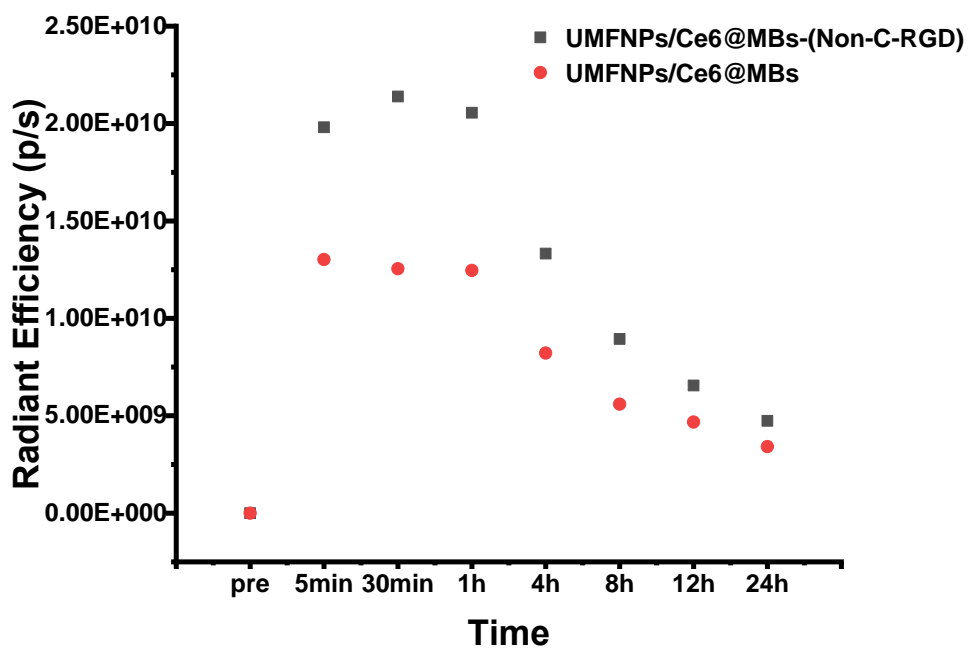

Fig. S2 Animal FL images of UMFNPs/Ce6@MBs and UMFNPs/Ce6@MBs-(Non-C-RGD) modification.

### Part 3. Anatomy of subcutaneous tumor

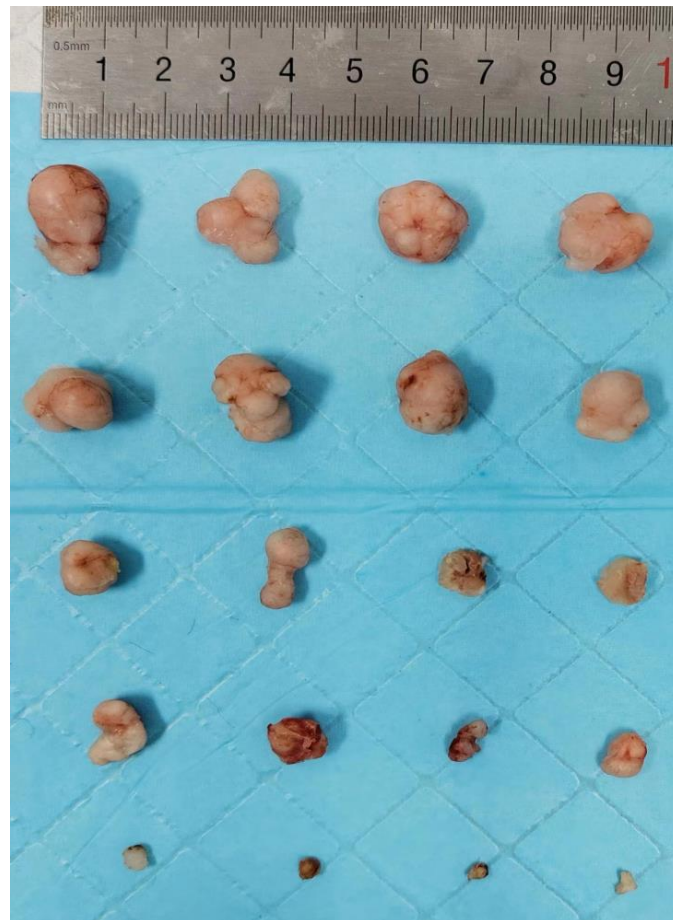

**Fig.S3** Weight of dissected tumor tissues from different groups after treatment. . From top to bottom is control group, UMFNPs/Ce6@MBs group, UMFNPs/Ce@MBs+SDT group, UMFNPs/Ce6@MBs+PDT group, UMFNPs/Ce6@MBs+SDPT group.

### Part 4. Focused ultrasonic probe

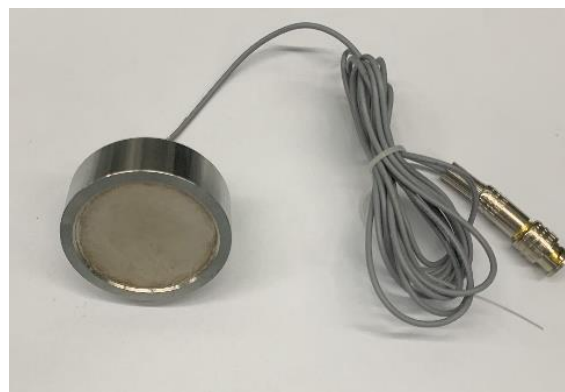

**Fig S4.** Focused ultrasonic probe is present.

## Part 5. Ultrasonic blasting instrument

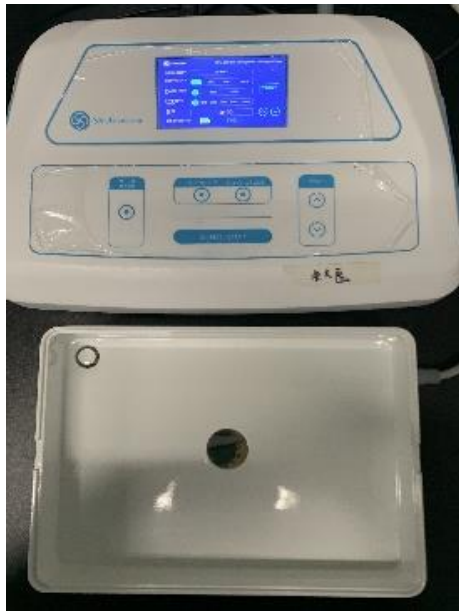

Fig.S5 Ultrasonic blasting instrument is present.

## Part 6. Confocal microscopy images

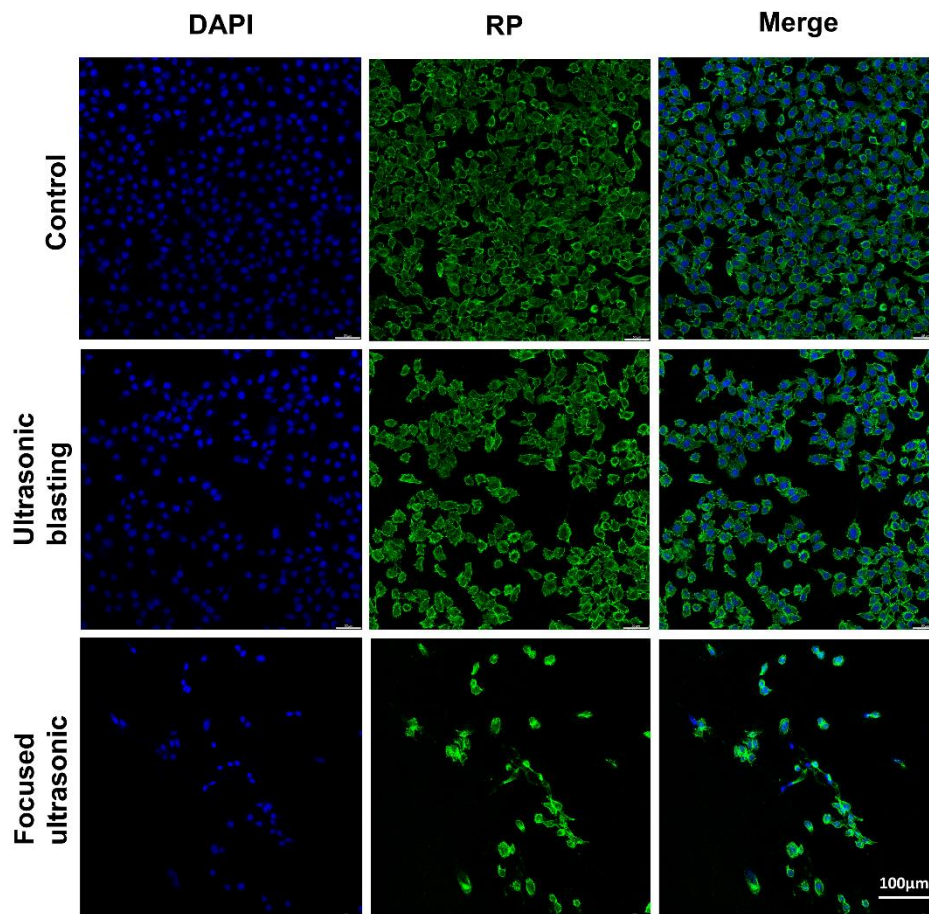

Fig.S6 The Huh-7 cells were observed by focusing ultrasound under confocal microscope.
