# Supplementary figures and images for: Use of UMFNPs/Ce6@MBs in multimodal imaging-guided sono-photodynamic combination therapy for hepatocellular carcinoma
Source: Royal Society of Chemistry journal article supplement (doi:10.1039/d4bm00613e), 2024-10-24

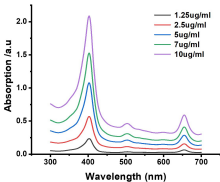

Supplement: d4bm00613e2.pdf [file d4bm00613e2.pdf]

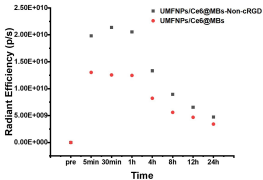

Supplement: d4bm00613e3.pdf [file d4bm00613e3.pdf]

**Control**

**UMFNPs/Ce6@MBs**

**UMFNPs/Ce6@MBs+SDT**

**UMFNPs/Ce6@MBs+PDT**

**UMFNPs/Ce6@MBs+SPDT**

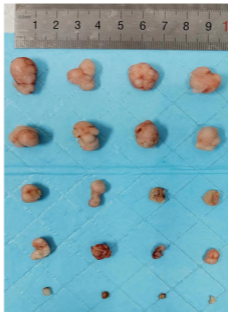

Supplement: d4bm00613e4.pdf [file d4bm00613e4.pdf]

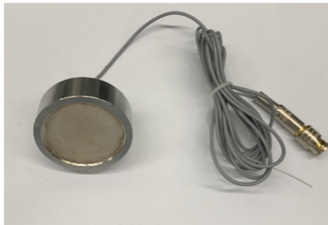

Supplement: d4bm00613e5.pdf [file d4bm00613e5.pdf]

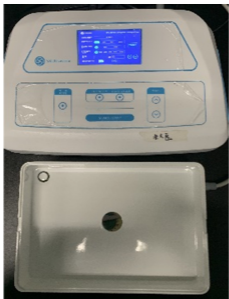

Supplement: d4bm00613e6.pdf [file d4bm00613e6.pdf]

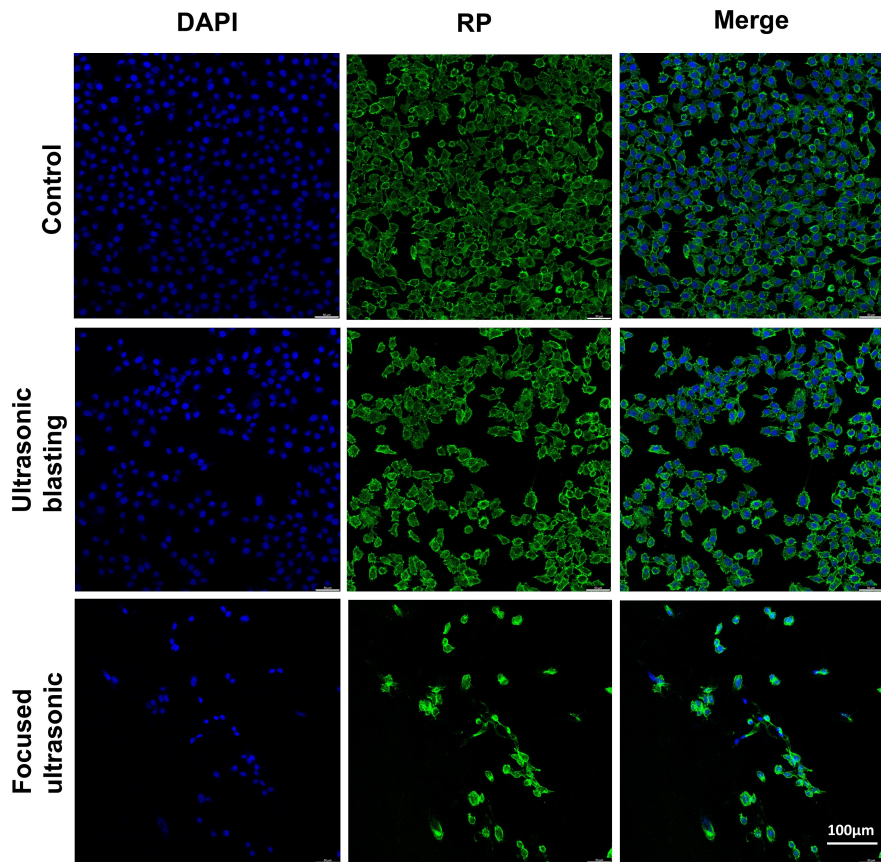

Supplement: d4bm00613e7.pdf [file d4bm00613e7.pdf]
